# Supplementary material
Source: HighWire-hosted journal article supplement (http://www.qdcxjkg.com/highwire/filestream/113473/field_highwire_adjunct_files/0/Supplementary_tables.pdf)
Supplement: Supplementary_tables.pdf [file Supplementary_tables.pdf]

**Table A. Pooled results. Increased risk (IR) in multiple respiratory health effects in 35+ year olds due to rising PM<sub>10</sub> (IQR = 24.9µg/m<sup>3</sup>) and NO<sub>2</sub> (IQR = 25.9µg/m<sup>3</sup>) at different lags, 6 Italian cities, 2001 – 2005**

|                  | lag        | hospitalisations for                |        |                               |       |                 |             |                               |                        |       |        | out-of-hospital respiratory deaths <sup>‡</sup> (n. 5490) |        |                               |                               |  |              |       |       |       |  |
|------------------|------------|-------------------------------------|--------|-------------------------------|-------|-----------------|-------------|-------------------------------|------------------------|-------|--------|-----------------------------------------------------------|--------|-------------------------------|-------------------------------|--|--------------|-------|-------|-------|--|
|                  |            | all respiratory diseases (n.100690) |        |                               |       | COPD (n. 38577) |             |                               | LRTI in COPD (n. 9886) |       |        | %                                                         | 95% CI | p <sub>HET</sub> <sup>†</sup> |                               |  |              |       |       |       |  |
|                  |            | %                                   | 95% CI | p <sub>HET</sub> <sup>†</sup> |       | %               | 95% CI      | p <sub>HET</sub> <sup>†</sup> |                        | %     | 95% CI |                                                           |        |                               | p <sub>HET</sub> <sup>†</sup> |  |              |       |       |       |  |
| PM <sub>10</sub> | <b>0</b>   | 1.32                                | 0.23   | 2.41                          | 0.597 |                 | <b>1.66</b> | -0.04                         | 3.40                   | 0.580 |        | 0.69                                                      | -2.71  | 4.22                          | 0.837                         |  | 2.83         | -1.54 | 7.38  | 0.898 |  |
|                  | <b>0-1</b> | <b>1.47</b>                         | 0.24   | 2.71                          | 0.718 |                 | 0.58        | -1.35                         | 2.55                   | 0.817 |        | 1.43                                                      | -2.35  | 5.35                          | 0.880                         |  | 4.66         | -0.42 | 10.00 | 0.376 |  |
|                  | <b>0-3</b> | 1.51                                | 0.03   | 3.01                          | 0.634 |                 | -0.35       | -2.65                         | 2.00                   | 0.475 |        | <b>4.81</b>                                               | 0.14   | 9.70                          | 0.655                         |  | <b>10.12</b> | 3.86  | 16.76 | 0.437 |  |
|                  | <b>2-5</b> | 0.87                                | -0.53  | 2.29                          | 0.330 |                 | -1.88       | -4.25                         | 0.55                   | 0.184 |        | 4.13                                                      | -0.76  | 9.27                          | 0.154                         |  | <b>11.58</b> | 5.55  | 17.96 | 0.517 |  |
|                  | <b>0-5</b> | 1.53                                | -0.17  | 3.27                          | 0.651 |                 | -1.06       | -3.68                         | 1.63                   | 0.424 |        | 3.75                                                      | -1.61  | 9.40                          | 0.585                         |  | <b>11.25</b> | 3.95  | 19.05 | 0.639 |  |
| NO <sub>2</sub>  | <b>0</b>   | 1.75                                | 0.08   | 3.44                          | 0.522 |                 | <b>3.13</b> | 0.44                          | 5.88                   | 0.574 |        | -0.36                                                     | -5.35  | 4.89                          | 0.589                         |  | 0.39         | -6.26 | 7.51  | 0.767 |  |
|                  | <b>0-1</b> | 1.94                                | 0.09   | 3.83                          | 0.987 |                 | 2.56        | -0.42                         | 5.62                   | 0.736 |        | -1.72                                                     | -7.17  | 4.05                          | 0.853                         |  | 2.98         | -4.59 | 11.15 | 0.820 |  |
|                  | <b>0-3</b> | 2.85                                | 0.63   | 5.12                          | 0.729 |                 | 2.23        | -1.30                         | 5.89                   | 0.724 |        | 2.96                                                      | -3.78  | 10.16                         | 0.820                         |  | 9.42         | -0.12 | 19.86 | 0.264 |  |
|                  | <b>2-5</b> | 1.90                                | -0.94  | 4.82                          | 0.033 |                 | -0.02       | -3.25                         | 3.31                   | 0.413 |        | 6.78                                                      | -1.87  | 16.18                         | 0.118                         |  | <b>18.92</b> | 9.41  | 29.25 | 0.194 |  |
|                  | <b>0-5</b> | <b>3.10</b>                         | 0.60   | 5.66                          | 0.837 |                 | 2.14        | -1.81                         | 6.25                   | 0.766 |        | <b>4.71</b>                                               | -2.97  | 12.99                         | 0.714                         |  | <b>16.26</b> | 5.05  | 28.67 | 0.521 |  |

**Table B. Pooled results. Percentage increased risk (IR) in respiratory disease hospitalisations and out-of-hospital respiratory deaths associated with 10 µg/m<sup>3</sup> increase in pollutants, in 35+-year olds, by season, 6 Italian cities, 2001 – 2005**

| pollutant PM <sub>10</sub>  |     |                           |      |       |        |                               |       |                |      |        |                               |       |       |                            |
|-----------------------------|-----|---------------------------|------|-------|--------|-------------------------------|-------|----------------|------|--------|-------------------------------|-------|-------|----------------------------|
|                             | lag | cold seasons <sup>#</sup> |      |       |        |                               |       | warm seasons + |      |        |                               |       |       | p interaction <sup>†</sup> |
|                             |     | N.                        | %    | % IR  | 95% CI | p <sub>HET</sub> <sup>‡</sup> | N.    | %              | % IR | 95% CI | p <sub>HET</sub> <sup>‡</sup> |       |       |                            |
| <b>hospitalisations for</b> |     |                           |      |       |        |                               |       |                |      |        |                               |       |       |                            |
| respiratory diseases        | 0-1 | 56,978                    | 56.6 | 0.25  | -0.25  | 0.76                          | 0.351 | 43,712         | 43.4 | 3.05   | 1.38                          | 4.74  | 0.010 | 0.006                      |
| COPD                        | 0   | 22,612                    | 58.6 | 0.25  | -0.49  | 0.99                          | 0.641 | 15,965         | 41.4 | 1.87   | 0.63                          | 3.12  | 0.615 | 0.076                      |
| LRTI in COPD                | 0-3 | 5,688                     | 37.4 | 1.21  | -0.63  | 3.08                          | 0.735 | 4,198          | 27.6 | 6.45   | 1.24                          | 11.92 | 0.081 | 0.026                      |
| <b>out-of-hospital</b>      |     |                           |      |       |        |                               |       |                |      |        |                               |       |       |                            |
| respiratory deaths          | 0-3 | 3,279                     | 59.7 | 3.94  | 1.44   | 6.51                          | 0.606 | 2,211          | 40.3 | 6.68   | -1.76                         | 15.84 | 0.060 | 0.553                      |
| pollutant NO <sub>2</sub>   |     |                           |      |       |        |                               |       |                |      |        |                               |       |       |                            |
|                             | lag | cold seasons <sup>#</sup> |      |       |        |                               |       | warm seasons + |      |        |                               |       |       | p interaction <sup>†</sup> |
|                             |     | N.                        | %    | % IR  | 95% CI | p <sub>HET</sub> <sup>‡</sup> | N.    | %              | % IR | 95% CI | p <sub>HET</sub> <sup>‡</sup> |       |       |                            |
| <b>hospitalisations for</b> |     |                           |      |       |        |                               |       |                |      |        |                               |       |       |                            |
| respiratory diseases        | 0-5 | 56,978                    | 56.6 | -0.30 | -1.38  | 0.78                          | 0.531 | 43,712         | 43.4 | 4.02   | 1.48                          | 6.62  | 0.060 | 0.002                      |
| COPD                        | 0   | 22,612                    | 58.6 | 0.73  | -0.73  | 2.21                          | 0.225 | 15,965         | 41.4 | 1.60   | -0.11                         | 3.33  | 0.482 | 0.453                      |
| LRTI in COPD                | 0-5 | 5,688                     | 37.4 | 1.41  | -2.12  | 5.06                          | 0.526 | 4,198          | 27.6 | 4.88   | -0.05                         | 10.05 | 0.936 | 0.269                      |
| <b>out-of-hospital</b>      |     |                           |      |       |        |                               |       |                |      |        |                               |       |       |                            |
| respiratory deaths          | 0-5 | 3,279                     | 59.7 | 4.28  | -2.04  | 11.01                         | 0.226 | 2,211          | 40.3 | 9.93   | 0.01                          | 20.84 | 0.21  | 0.362                      |

<sup>#</sup>October to March. <sup>+</sup>April to September. <sup>‡</sup>p-value of heterogeneity test (null hypothesis is perfect homogeneity of city-specific results).  
<sup>†</sup> p-value derived from the model with the interaction term (one season with respect to another as referent category).

**Table C. Pooled results. Increased risk (IR) in respiratory disease hospitalisations and out-of-hospital respiratory deaths associated with 10 µg/m<sup>3</sup> increase in PM<sub>10</sub>, in 35+year-old people, by demographic characteristics and previous diseases, 6 Italian cities, 2001 - 2005.**

|                                                              | hospitalisation for all respiratory diseases |            |                   |             |             |                    |                      | hospitalisations for COPD |            |                   |              |             |                    |                      |
|--------------------------------------------------------------|----------------------------------------------|------------|-------------------|-------------|-------------|--------------------|----------------------|---------------------------|------------|-------------------|--------------|-------------|--------------------|----------------------|
|                                                              | N.                                           | %          | % IR <sup>§</sup> | 95% CI      |             | p HET <sup>‡</sup> | p inter <sup>†</sup> | N.                        | %          | % IR <sup>§</sup> | 95% CI       |             | p HET <sup>‡</sup> | p inter <sup>†</sup> |
| <b>Total</b>                                                 | <b>100,690</b>                               | <b>100</b> | <b>0.59</b>       | <b>0.10</b> | <b>1.08</b> | <b>0.718</b>       | <b>-</b>             | <b>38,577</b>             | <b>100</b> | <b>0.67</b>       | <b>-0.02</b> | <b>1.35</b> | <b>0.580</b>       | <b>-</b>             |
| <b>Age (years)</b>                                           |                                              |            |                   |             |             |                    |                      |                           |            |                   |              |             |                    |                      |
| 35-64                                                        | 22,572                                       | 22.4       | 0.05              | -0.86       | 0.97        | 0.984              | -                    | 5,939                     | 15.4       | 0.20              | -1.24        | 1.66        | 0.748              | -                    |
| 65-74                                                        | 26,093                                       | 25.9       | 0.54              | -0.52       | 1.61        | 0.111              | 0.513                | 11,640                    | 30.2       | 1.17              | -0.60        | 2.97        | 0.019              | 0.230                |
| 75-84                                                        | 34,492                                       | 34.3       | 0.79              | 0.06        | 1.52        | 0.813              | 0.205                | 15,092                    | 39.1       | 0.71              | -0.28        | 1.70        | 0.235              | 0.537                |
| 85+                                                          | 17,533                                       | 17.4       | 1.24              | 0.25        | 2.23        | 0.541              | 0.131                | 5,906                     | 15.3       | 0.05              | -1.49        | 1.61        | 0.689              | 0.642                |
| <b>Gender</b>                                                |                                              |            |                   |             |             |                    |                      |                           |            |                   |              |             |                    |                      |
| men                                                          | 56,647                                       | 56.3       | 0.50              | -0.08       | 1.09        | 0.310              | -                    | 23,000                    | 59.6       | 0.93              | 0.02         | 1.85        | 0.320              | -                    |
| women                                                        | 44,043                                       | 43.7       | 0.79              | 0.14        | 1.44        | 0.740              | 0.473                | 15,577                    | 40.4       | 0.22              | -0.73        | 1.18        | 0.964              | 0.371                |
| <b>Heart diseases in the previous 2 years</b>                |                                              |            |                   |             |             |                    |                      |                           |            |                   |              |             |                    |                      |
| yes                                                          | 38,416                                       | 38.2       | 0.64              | -0.05       | 1.34        | 0.612              | 0.924                | 17,394                    | 45.1       | 0.71              | -0.21        | 1.63        | 0.728              | 0.795                |
| Ischemic heart diseases (ICD-9: 410-414)*                    | 12,495                                       | 12.4       | 1.59              | 0.41        | 2.79        | 0.697              | 0.074                | 5,466                     | 14.2       | 1.93              | 0.33         | 3.55        | 0.388              | 0.068                |
| Diseases of pulmonary circulation (ICD-9: 415-417)*          | 3,349                                        | 3.3        | -0.65             | -3.14       | 1.91        | 0.259              | 0.326                | 2,131                     | 5.5        | -0.42             | -3.38        | 2.63        | 0.212              | 0.554                |
| Conduction disorders (ICD-9: 426); arrhythmias (ICD-9: 427)* | 10,197                                       | 10.1       | 0.70              | -0.57       | 1.98        | 0.687              | 0.910                | 4,293                     | 11.1       | 1.26              | -0.35        | 2.90        | 0.771              | 0.482                |
| Heart failure (ICD-9: 428)*                                  | 9,585                                        | 9.5        | -0.67             | -2.15       | 0.83        | 0.060              | 0.084                | 4,389                     | 11.4       | -0.46             | -2.22        | 1.33        | 0.311              | 0.244                |
| <b>Other diseases in the previous 2 years</b>                |                                              |            |                   |             |             |                    |                      |                           |            |                   |              |             |                    |                      |
| Cancer (ICD-9: 140-208)                                      | 7,610                                        | 7.6        | 0.66              | -1.38       | 2.73        | 0.048              | 0.959                | 2,193                     | 5.7        | -0.03             | -2.58        | 2.59        | 0.475              | 0.689                |
| Diabetes (ICD-9: 250)                                        | 9,857                                        | 9.8        | 0.01              | -1.63       | 1.67        | 0.302              | 0.426                | 4,099                     | 10.6       | -0.40             | -2.59        | 1.83        | 0.283              | 0.429                |
| Cerebrovascular diseases (ICD-9: 430-438)*                   | 8,068                                        | 8.0        | 1.07              | -0.35       | 2.52        | 0.618              | 0.531                | 3,075                     | 8.0        | 1.29              | -0.65        | 3.27        | 0.530              | 0.524                |
| Chronic pulmonary diseases (ICD-9: 490-505)                  | 25,490                                       | 25.3       | 0.69              | -0.16       | 1.54        | 0.366              | 0.897                | 15,782                    | 40.9       | 0.57              | -0.40        | 1.54        | 0.727              | 0.910                |
| Cirrhosis and other chronic liver disease (ICD-9: 571-572)   | 2,804                                        | 2.8        | 0.70              | -1.72       | 3.17        | 0.483              | 0.976                | 1,235                     | 3.2        | 0.38              | -2.89        | 3.76        | 0.830              | 0.847                |
| Renal failure (ICD-9: 584-588)                               | 5,168                                        | 5.1        | -0.09             | -1.86       | 1.70        | 0.259              | 0.411                | 1,829                     | 4.7        | 0.45              | -2.82        | 3.84        | 0.048              | 0.953                |

<sup>§</sup> percentage increase of risk has been estimated at the best lag for each outcome: hospitalisations for respiratory diseases (lag 0-1), for COPD (lag 0), for LRTI in COPD (lag 0-3), out-of-hospital mortality (lag 0-3). <sup>‡</sup> p-value of heterogeneity test (null hypothesis is perfect homogeneity of city-specific results).

<sup>†</sup> p-value derived from the model with the interaction term (for each condition, the reference category is the group of subjects without the disease).

\*discharge diagnosis in the period 29 days - 2 years before death

**Table C (cont). Pooled results. Increased risk in respiratory disease hospitalisations and out-of-hospital respiratory deaths associated with 10 µg/m<sup>3</sup> increase in PM<sub>10</sub>, in 35+ year-old people, by demographic characteristics and previous diseases, 6 Italian cities, 2001 - 2005.**

|                                                              | hospitalisation for LRTI in COPD |            |                   |             |             |                    |                      | out-of-hospital respiratory deaths |            |                   |             |             |                    |                      |
|--------------------------------------------------------------|----------------------------------|------------|-------------------|-------------|-------------|--------------------|----------------------|------------------------------------|------------|-------------------|-------------|-------------|--------------------|----------------------|
|                                                              | N.                               | %          | % IR <sup>§</sup> | 95% CI      |             | p HET <sup>‡</sup> | p inter <sup>†</sup> | N.                                 | %          | % IR <sup>§</sup> | 95% CI      |             | p HET <sup>‡</sup> | p inter <sup>†</sup> |
| <b>Total</b>                                                 | <b>9,886</b>                     | <b>100</b> | <b>1.91</b>       | <b>0.06</b> | <b>3.79</b> | <b>0.655</b>       | <b>-</b>             | <b>5,490</b>                       | <b>100</b> | <b>3.95</b>       | <b>1.53</b> | <b>6.43</b> | <b>0.344</b>       | <b>-</b>             |
| <b>Age (years)</b>                                           |                                  |            |                   |             |             |                    |                      |                                    |            |                   |             |             |                    |                      |
| 35-64                                                        | 1,563                            | 15.8       | 0.78              | -3.41       | 5.15        | 0.827              | -                    | 288                                | 5.2        | -5.38             | -14.10      | 4.22        | 0.397              | -                    |
| 65-74                                                        | 2,569                            | 26.0       | 0.77              | -2.23       | 3.86        | 0.501              | 0.883                | 575                                | 10.5       | 4.00              | -2.98       | 11.48       | 0.707              | 0.120                |
| 75-84                                                        | 3,726                            | 37.7       | 2.42              | -0.19       | 5.10        | 0.432              | 0.504                | 1,682                              | 30.6       | 5.07              | 1.01        | 9.30        | 0.704              | 0.049                |
| 85+                                                          | 2,028                            | 20.5       | 3.78              | 0.45        | 7.22        | 0.660              | 0.243                | 2,944                              | 53.6       | 4.82              | 1.81        | 7.92        | 0.468              | 0.047                |
| <b>Gender</b>                                                |                                  |            |                   |             |             |                    |                      |                                    |            |                   |             |             |                    |                      |
| men                                                          | 6,344                            | 64.2       | 2.46              | 0.41        | 4.56        | 0.879              | -                    | 2,550                              | 46.4       | 1.98              | -1.32       | 5.40        | 0.098              | -                    |
| women                                                        | 3,542                            | 35.8       | 1.27              | -1.36       | 3.96        | 0.296              | 0.486                | 2,940                              | 53.6       | 6.15              | 3.06        | 9.33        | 0.395              | 0.076                |
| <b>Heart diseases in the previous 2 years</b>                |                                  |            |                   |             |             |                    |                      |                                    |            |                   |             |             |                    |                      |
| yes                                                          | 3,742                            | 37.9       | 2.40              | -0.21       | 5.08        | 0.791              | 0.690                | 1,392                              | 25.4       | 6.00              | 1.68        | 10.51       | 0.933              | 0.348                |
| Ischemic heart diseases (ICD-9: 410-414)*                    | 1,227                            | 12.4       | 4.89              | 0.29        | 9.69        | 0.755              | 0.192                | 476                                | 8.7        | 3.42              | -3.40       | 10.72       | 0.943              | 0.820                |
| Diseases of pulmonary circulation (ICD-9: 415-417)*          | 287                              | 2.9        | 4.50              | -6.71       | 17.1        | 0.313              | 0.634                | 197                                | 3.6        | 6.71              | -8.11       | 23.91       | 0.083              | 0.745                |
| Conduction disorders (ICD-9: 426); arrhythmias (ICD-9: 427)* | 982                              | 9.9        | 4.41              | -0.41       | 9.46        | 0.064              | 0.345                | 475                                | 8.7        | 5.35              | -1.56       | 12.76       | 0.596              | 0.748                |
| Heart failure (ICD-9: 428)*                                  | 901                              | 9.1        | 2.01              | -3.17       | 7.47        | 0.075              | 0.980                | 444                                | 8.1        | 7.69              | -1.70       | 17.98       | 0.048              | 0.452                |
| <b>Other diseases in the previous 2 years</b>                |                                  |            |                   |             |             |                    |                      |                                    |            |                   |             |             |                    |                      |
| Cancer (ICD-9: 140-208)                                      | 644                              | 6.5        | 0.87              | -4.84       | 6.92        | 0.512              | 0.637                | 196                                | 3.6        | -5.32             | -16.64      | 7.53        | 0.169              | 0.134                |
| Diabetes (ICD-9: 250)                                        | 855                              | 8.6        | 3.45              | -2.46       | 9.73        | 0.121              | 0.693                | 298                                | 5.4        | -0.66             | -9.91       | 9.55        | 0.845              | 0.324                |
| Cerebrovascular diseases (ICD-9: 430-438)*                   | 872                              | 8.8        | 4.52              | -0.64       | 9.96        | 0.938              | 0.287                | 570                                | 10.4       | 4.09              | -2.18       | 10.76       | 0.818              | 0.956                |
| Chronic pulmonary diseases (ICD-9: 490-505)                  | 2,942                            | 29.8       | 2.85              | -0.10       | 5.88        | 0.711              | 0.512                | 1,174                              | 21.4       | 5.33              | 0.42        | 10.47       | 0.149              | 0.688                |
| Cirrhosis and other chronic liver disease (ICD-9: 571-572)   | 271                              | 2.7        | 9.21              | -0.39       | 19.73       | 0.066              | 0.156                | -                                  | -          | -                 | -           | -           | -                  | -                    |
| Renal failure (ICD-9: 584-588)                               | 476                              | 4.8        | 3.06              | -4.00       | 10.63       | 0.934              | 0.742                | -                                  | -          | -                 | -           | -           | -                  | -                    |

§ percentage increase of risk has been estimated at the best lag for each outcome: hospitalisations for respiratory diseases (lag0-1), for COPD (lag 0), for LRTI in COPD (lag 0-3), out-of-hospital mortality (lag 0-3). ‡ p-value of heterogeneity test (null hypothesis is perfect homogeneity of city-specific results).

† p-value derived from the model with the interaction term (for each condition, the reference category is the group of subjects without the disease).

\*discharge diagnosis in the period 29 days - 2 years before death
